# Supplementary material for: Multifunctional Gold Nanoparticles Overcome MicroRNA Regulatory Network Mediated-Multidrug Resistant Leukemia
Source: PubMed Central journal article supplement (PMC6440980; doi:10.1038/s41598-019-41866-y), 2019-03-29
Supplement: 41598_2019_41866_MOESM1_ESM.pdf [file 41598_2019_41866_MOESM1_ESM.pdf]

# Supporting Information

## Multifunctional Gold Nanoparticles Overcome MicroRNA Regulatory Network Mediated- Multidrug Resistant Leukemia

*Rong Deng<sup>a,b</sup>, Bai Ji<sup>c</sup>, Hongliang Yu<sup>b</sup>, Wei Bao<sup>a</sup>, Zhuoqi Yang<sup>b</sup>, Ying Yu<sup>a</sup>, Yahan Cui<sup>b</sup>,  
Yangyang Du<sup>a</sup>, Meiyu Song<sup>a</sup>, Shujun Liu<sup>d</sup>, Kamel Meguellati<sup>b,\*</sup>, Fei Yan<sup>a,b,\*</sup>*

<sup>a</sup>State Key Laboratory of Inorganic Synthesis and Preparative Chemistry, International Research Center for Chemistry-Medicine Joint Innovation, College of Chemistry, Jilin University, 2699 Qianjin Street, Changchun 130012, China

<sup>b</sup>International Joint Research Laboratory of Nano-Micro Architecture Chemistry (NMAC), College of Chemistry, Jilin University, 2699 Qianjin Street, Changchun 130012, China

<sup>c</sup>Department of Hepatobiliary and Pancreatic Surgery, the First Hospital of Jilin University, Changchun 130021, China.

<sup>d</sup>The Hormel Institute, University of Minnesota, 801 16th Avenue NE, Austin, MN 55912, USA;

Correspondence and requests for materials should be addressed to F. Y. (email: [feiyang@jlu.edu.cn](mailto:feiyang@jlu.edu.cn)) or to K. M. (email: [kameljilin@yahoo.fr](mailto:kameljilin@yahoo.fr)).

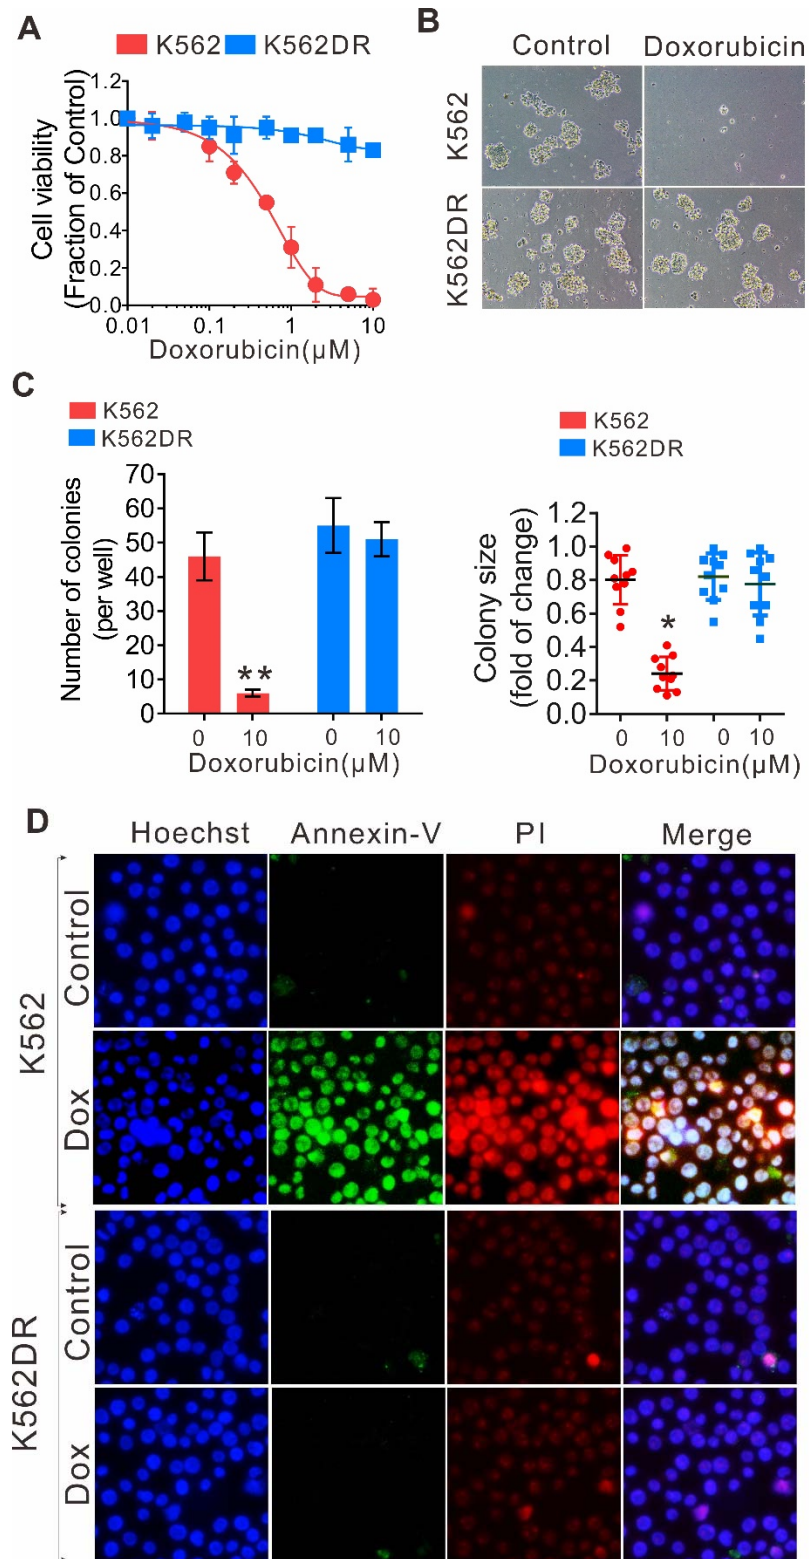

Figure S1. Characterization of K562 drug-resistant cells. (A) CCK-8 assays for cell proliferation in parental K562 and resistant cells treated with doxorubicin for 72 hours. The data represent three independent experiments with three repeats in total. (B) Colony-forming assays in parental cells treated with 10  $\mu\text{M}$  doxorubicin or PBS control. Photographs show representative clones. (C)

Graphs indicate the colony number from 3 independent experiments (left) and quantification of clone sizes from ten clones (right). Data are mean  $\pm$ SD; \* $P$ <0.05, \*\* $P$ <0.01. (D) Fluorescence assay for apoptosis in K562 or K562DR cells treated with 10  $\mu$ M doxorubicin or PBS control for 24 hours (blue, hoechst; green, Annexin-V; red, PI).

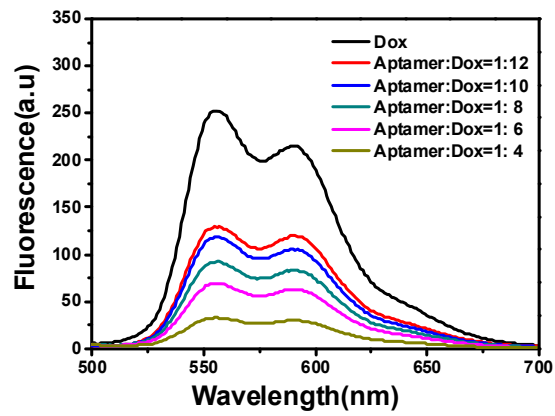

Figure S2. Fluorescence for the interaction between DOX and AS1411. Fluorescence spectra of Dox when they were conjugated with AS1411 under different molar ratios.

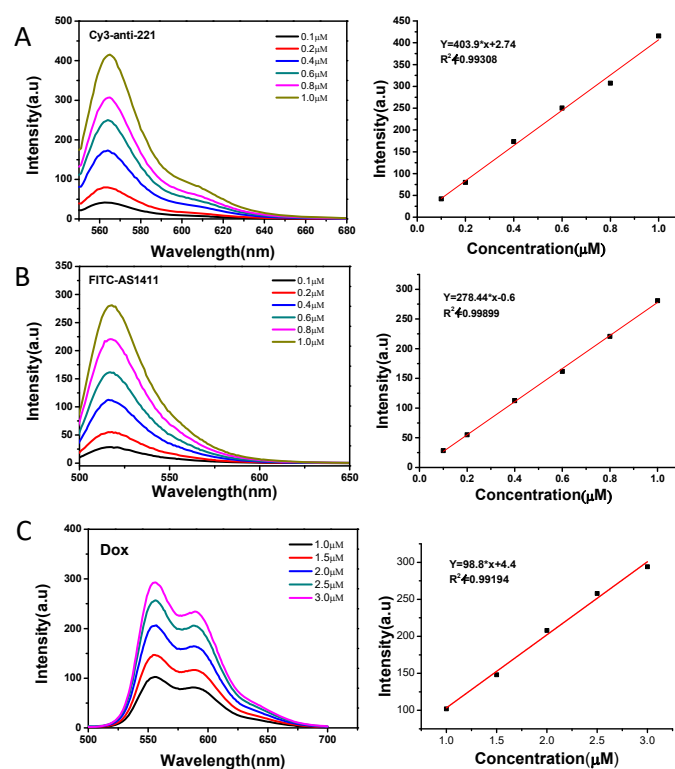

D

| Type \ Measurement | AS1411  | anti221 | Dox     |
|--------------------|---------|---------|---------|
| 1                  | 103/200 | 101/200 | 284/500 |
| 2                  | 106/200 | 95/200  | 292/500 |
| 3                  | 112/200 | 106/200 | 281/500 |
| SEM                | 4.6     | 5.5     | 5.7     |
| Average            | 107     | 101     | 286     |

Figure S3. Estimation of the loading capacity of AS1411, anti-221 and DOX on the surface of gold nanoparticles. (A-C) Fluorescence spectra and standard curves of AS1411, anti-221 and DOX in the PBS buffer. (D) Summary of the loading number of AS1411, anti-221 and DOX on the surface of gold nanoparticles (mol per particle).

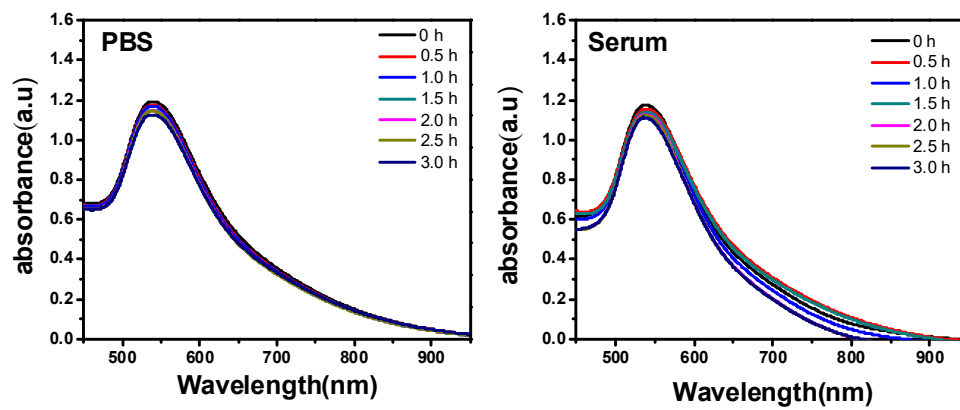

Figure S4. The stability of the NPsFA- AS1411/DOX/a221 in PBS and serum for 3 h.

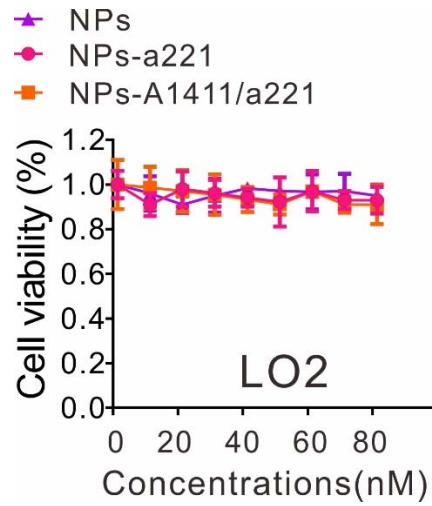

Figure S5. Nanoparticles have no effect on LO2 cells. CCK-8 assays for cell proliferation in LO2 cells treated with different doses of indicated nanoparticles for 72 hours. The data represent 3 independent experiments with 3 repeats in total.

Full-length gels

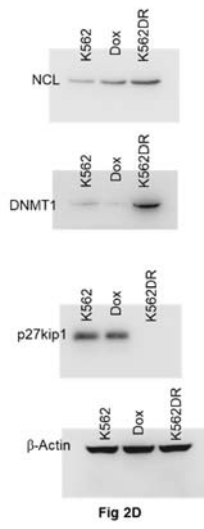

Fig 2D

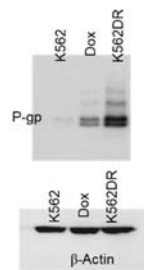

Fig 2F

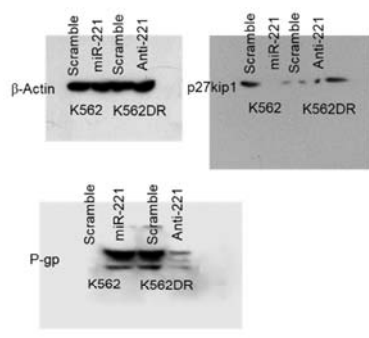

Fig 2H

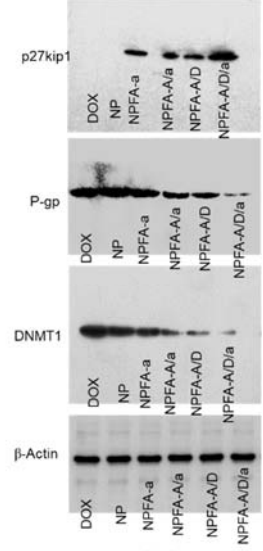

Fig 5C
